# Supplementary material
Source: Springer Nature journal article supplement (https://www.springermedizin.de/resource/supplementary/12911_2005_101_MOESM3_ESM.pdf/9527130)
Supplement: MOESM3 [file 9527130]

```

<?xml version="1.0" encoding="UTF-8"?>
<Envelope xmlns:xsi="http://www.w3.org/2001/XMLSchema-instance"
xsi:noNamespaceSchemaLocation="variable.xsd">
<Header>
  <Identifiers>
    <FirstName>John</FirstName>
    <LastName>Doe</LastName>
    <DateOfBirth>1900-01-01</DateOfBirth>
    <SSN>123456789</SSN>
    <AccessionNumber>s90-00001D</AccessionNumber>
    <LocalMRN>11111111</LocalMRN>
    <Source>ABC</Source>
  </Identifiers>
</Header>
<Body>
<PathologyCase TissueAcquisitionDate="1990-01-01"><Codes />
  <Clinical>
    <Patient>
      <Age Units="years">90</Age>
      <Gender>M</Gender>
    </Patient>
  </Clinical>
  <BillingDiagnosis Type="LightMicroscopy"><Term /></BillingDiagnosis>
  <Specimen Key="00" Type="Surgical">
    <SpecimenAcquisitionProcedure><Term /></SpecimenAcquisitionProcedure>
    <Diagnosis />
  </Specimen>
  <Specimen Key="1" />
    <GrossDescriptionText>
      <![CDATA[SPECIMEN SUBMITTED:  GASTRIC BIOPSIES
      GROSS: Received in formalin labelled  xxxxxxxxxxxxxxxxxxxxxxxx
      xxxxxxxxxxxxxxxxxxxxxxxx is a 0.2 x 0.2 cm fragment of pink
      tissue, submitted in cassette A.
      CLINICAL: Heartburn]]>
    </GrossDescriptionText>
    <DiagnosisText>
      <![CDATA[DIAGNOSIS:
      Gastric mucosal biopsy antrum :
      1. Diffuse active gastritis.
      2. Bacillary forms consistent with H. pylori are identified.]]>
    </DiagnosisText>
    <FullReportText>
      <![CDATA[SPECIMEN SUBMITTED:  GASTRIC BIOPSIES
      DIAGNOSIS:
      Gastric mucosal biopsy antrum :
      1. Diffuse active gastritis.
      2. Bacillary forms consistent with H. pylori are identified.
      GROSS: Received in formalin labelled  xxxxxxxxxxxxxxxxxxxxxxxx
      xxxxxxxxxxxxxxxxxxxxxxxx is a 0.2 x 0.2 cm fragment of pink
      tissue, submitted in cassette A.
      CLINICAL: Heartburn]]>
    </FullReportText>
  </PathologyCase>
</Body>
<!-- Scrubber version 1.0.4 beta-->
</Envelope>

```
